# Supplementary material
Source: publisher site journal article supplement (https://www.dovepress.com/article/436776)
Supplement: Supplementary file 1 [file get_supplementary_file.php]

**Supplement Figures**


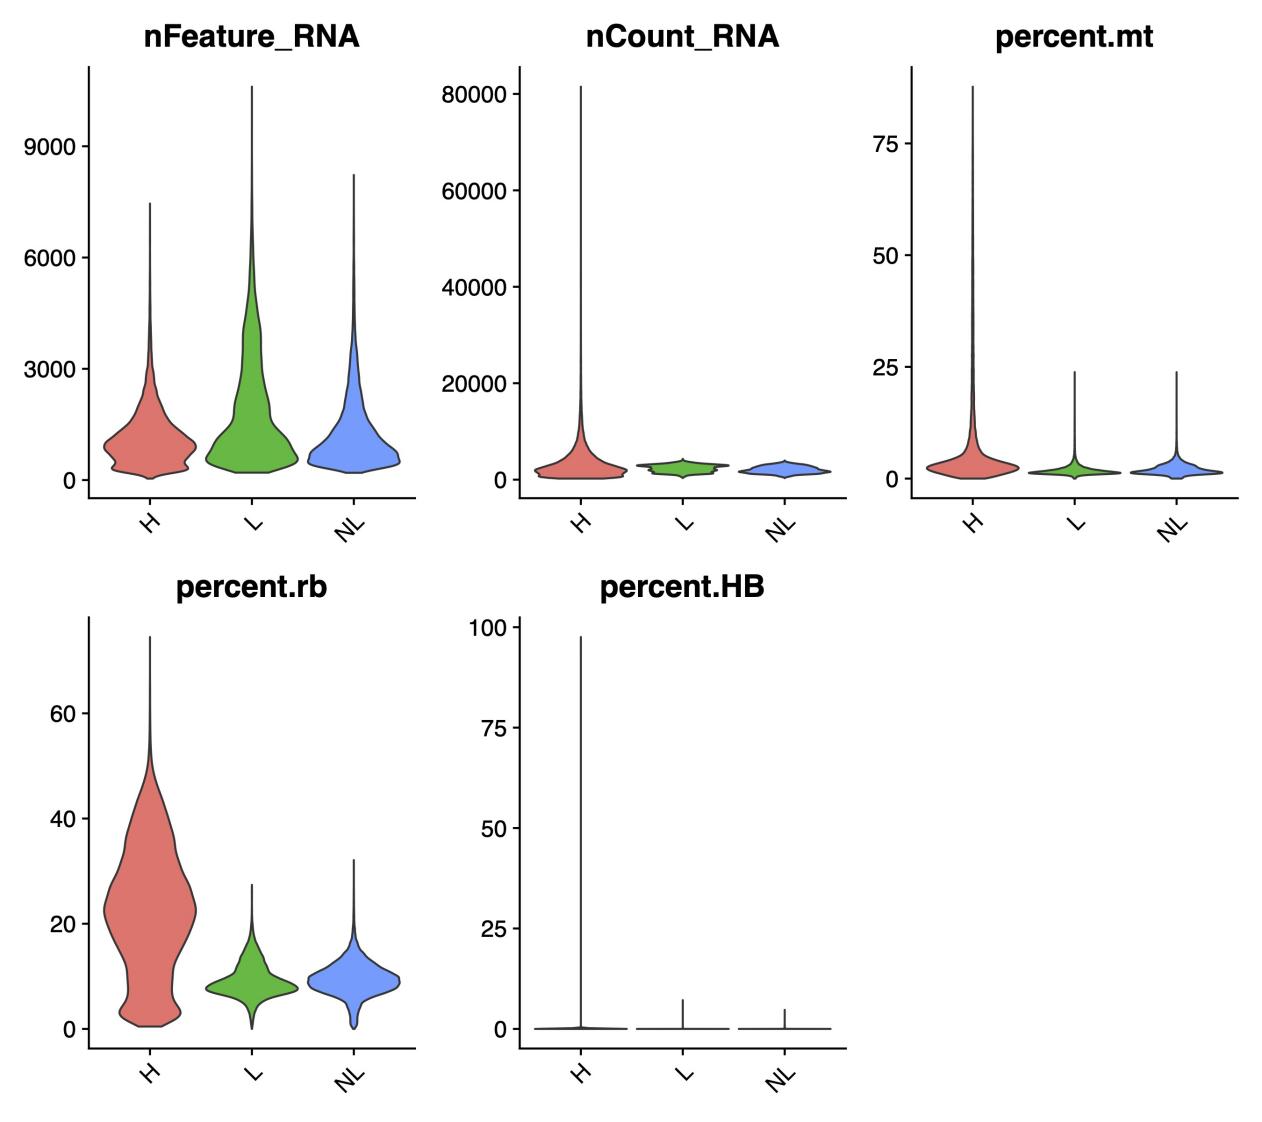


Figure S1 Overall quality of data before quality control


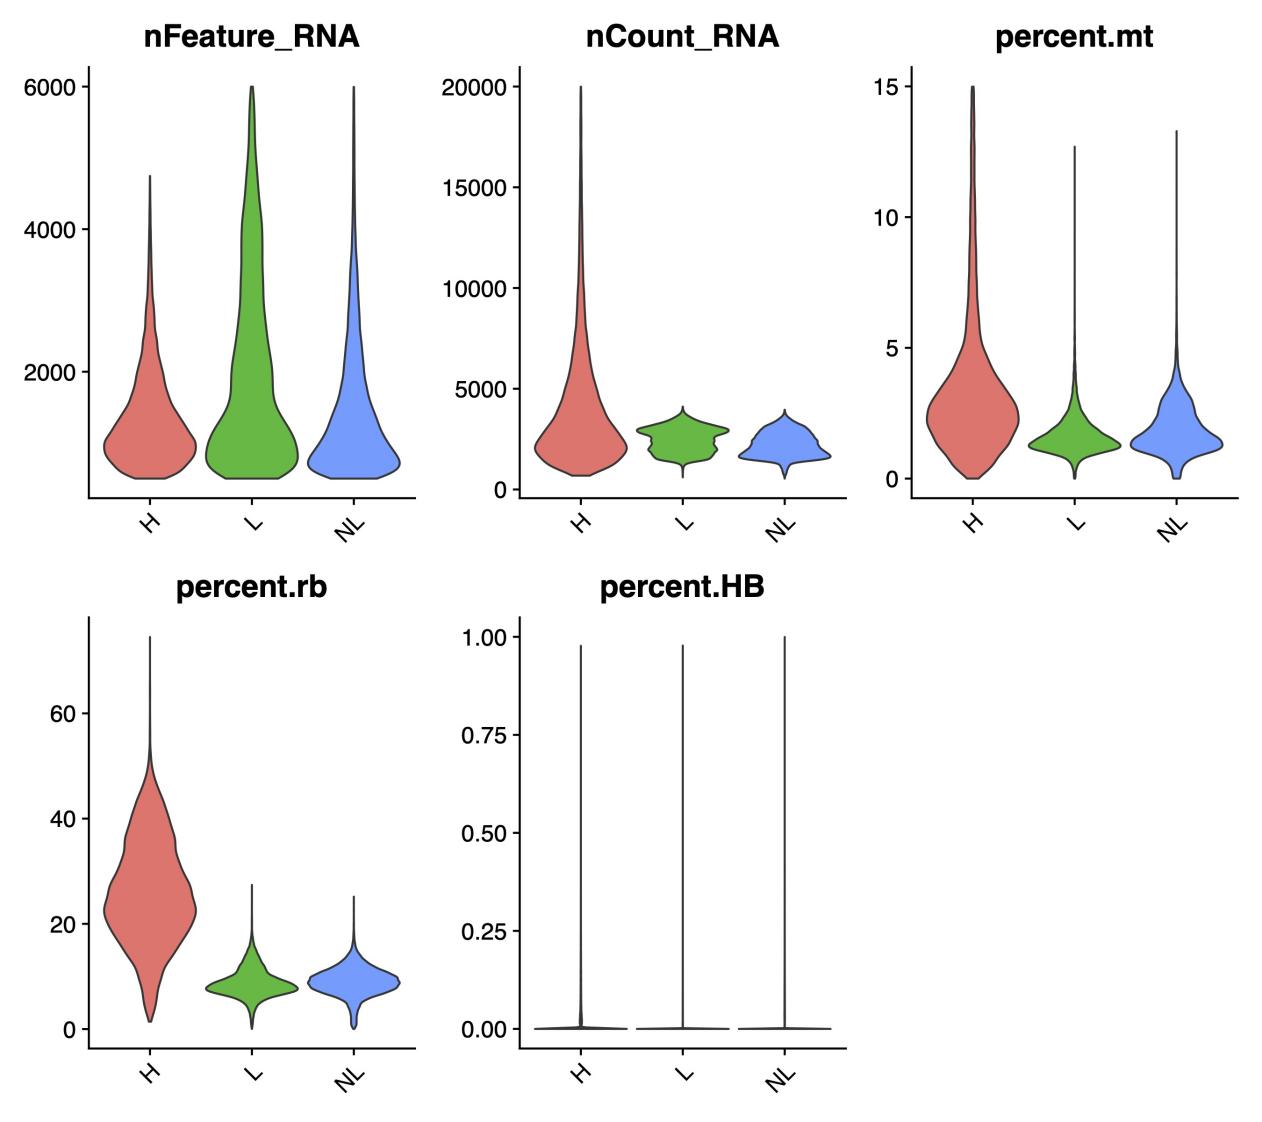


Figure S2 Overall quality of data after quality control


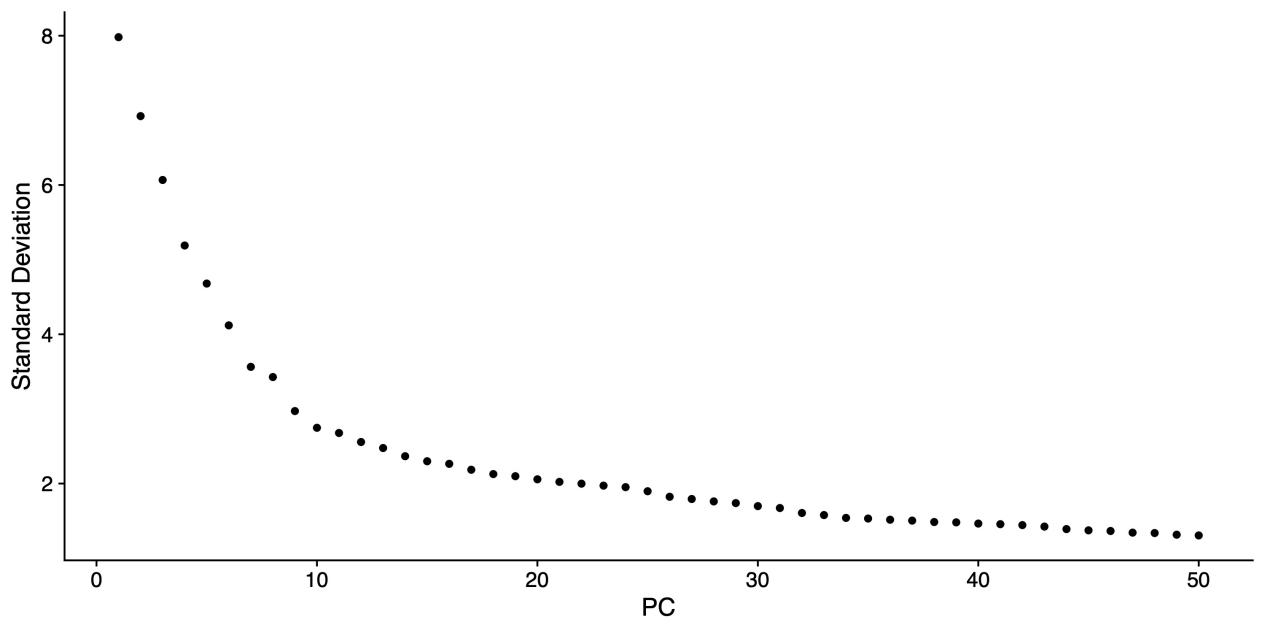


Figure S3 Elbow diagram of PCA


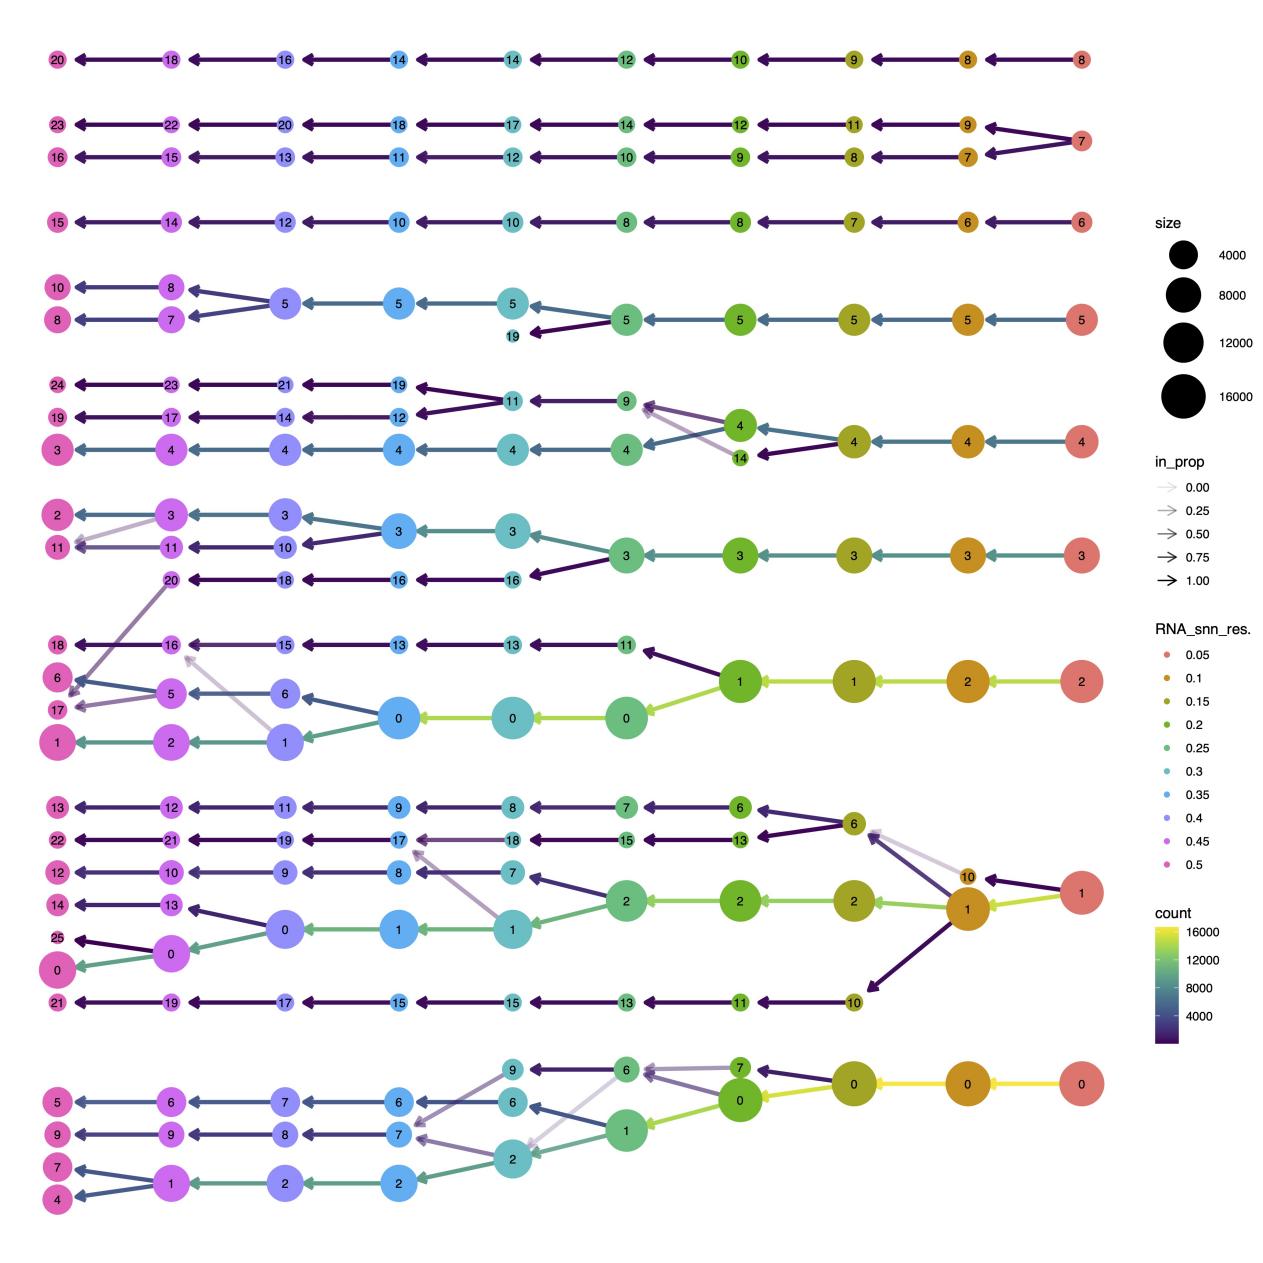


Figure S4 Change of cell cluster number at different resolutions


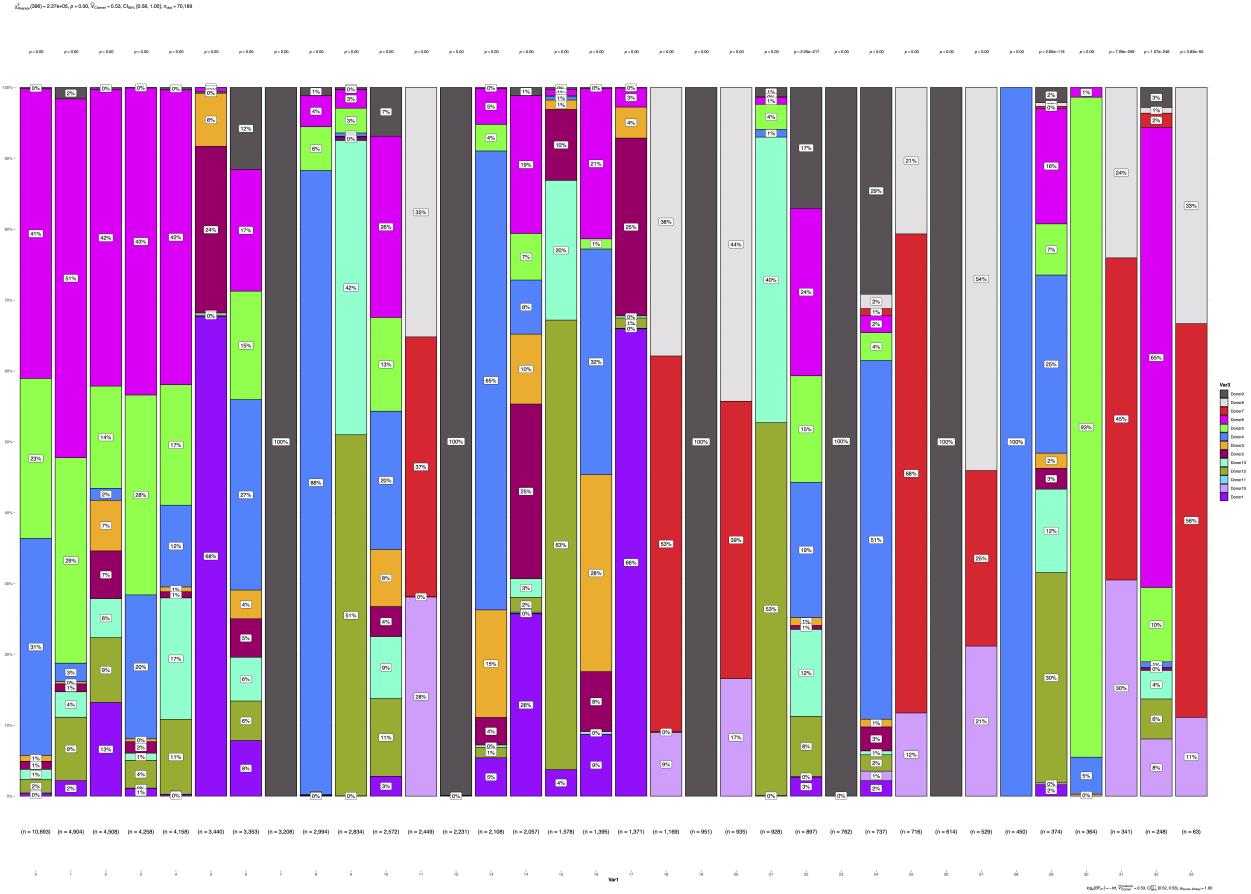


Figure S5 Comparison of source cells of each cell cluster without batch correction


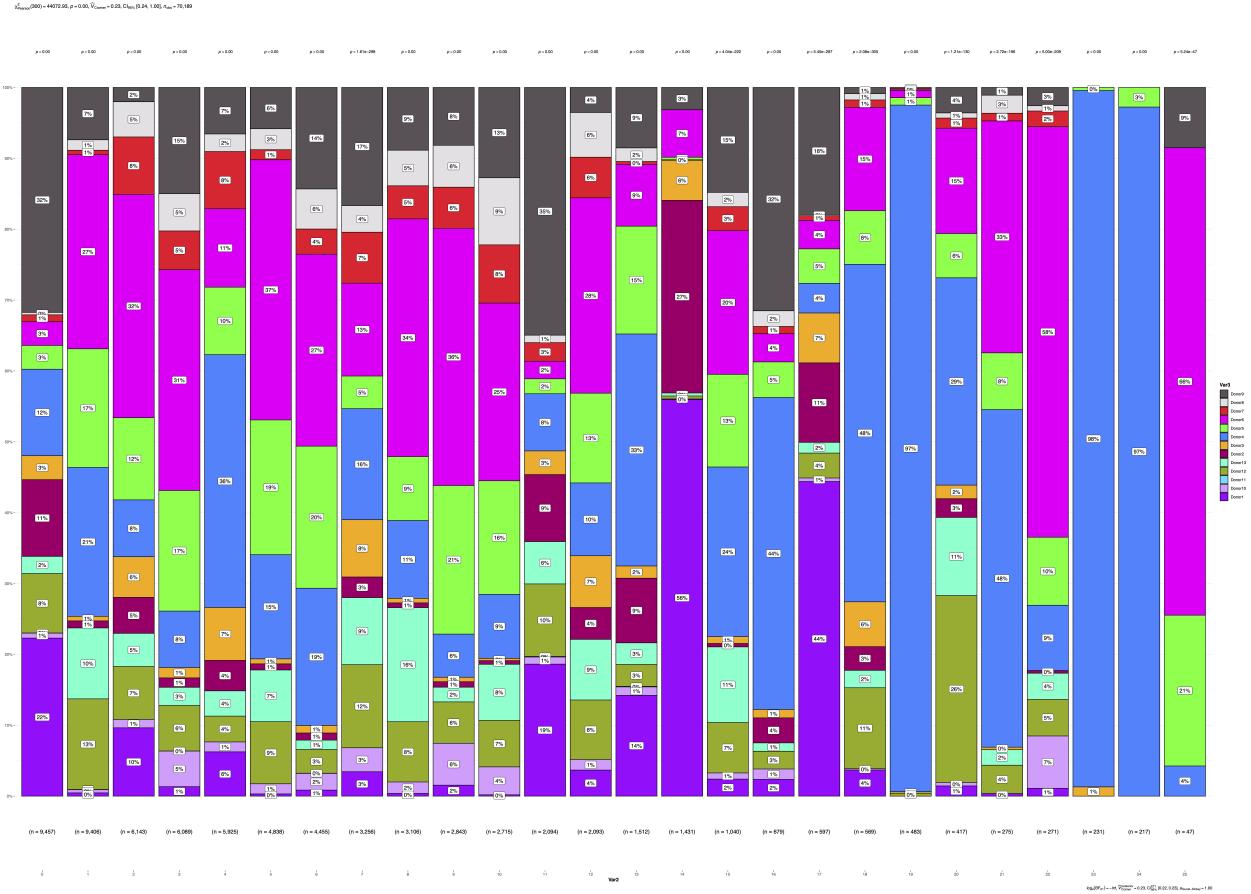


Figure S6 Comparison of source cells of each cell cluster with harmony batch correction


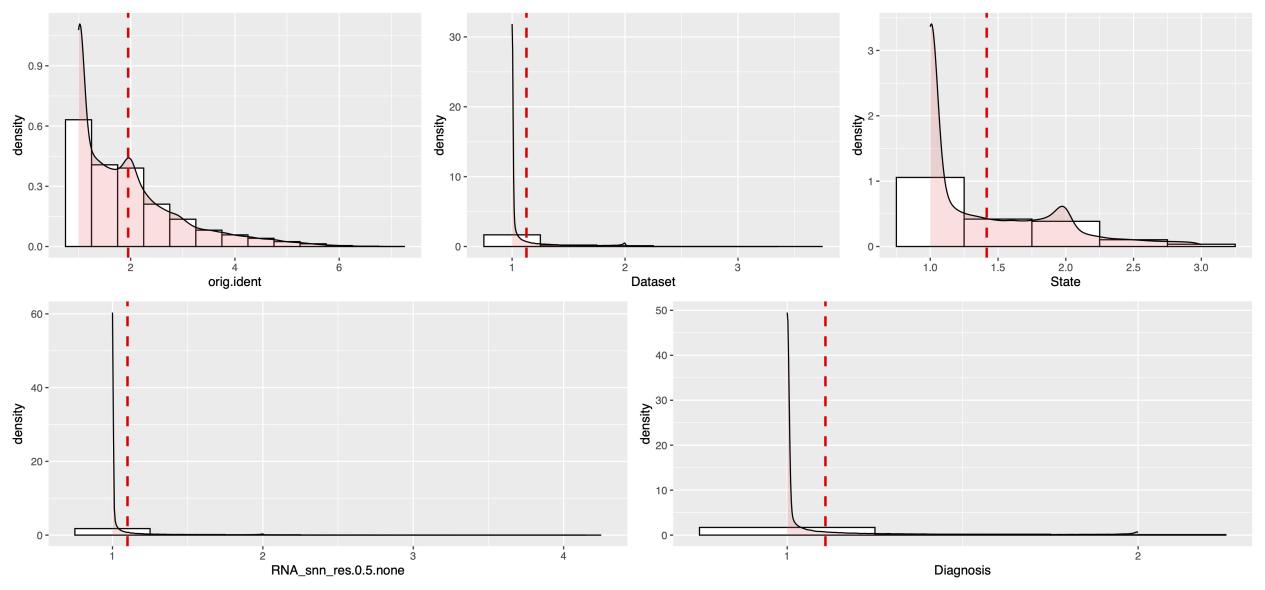


Figure S7 Comparison of lisi score of different situation without batch correction


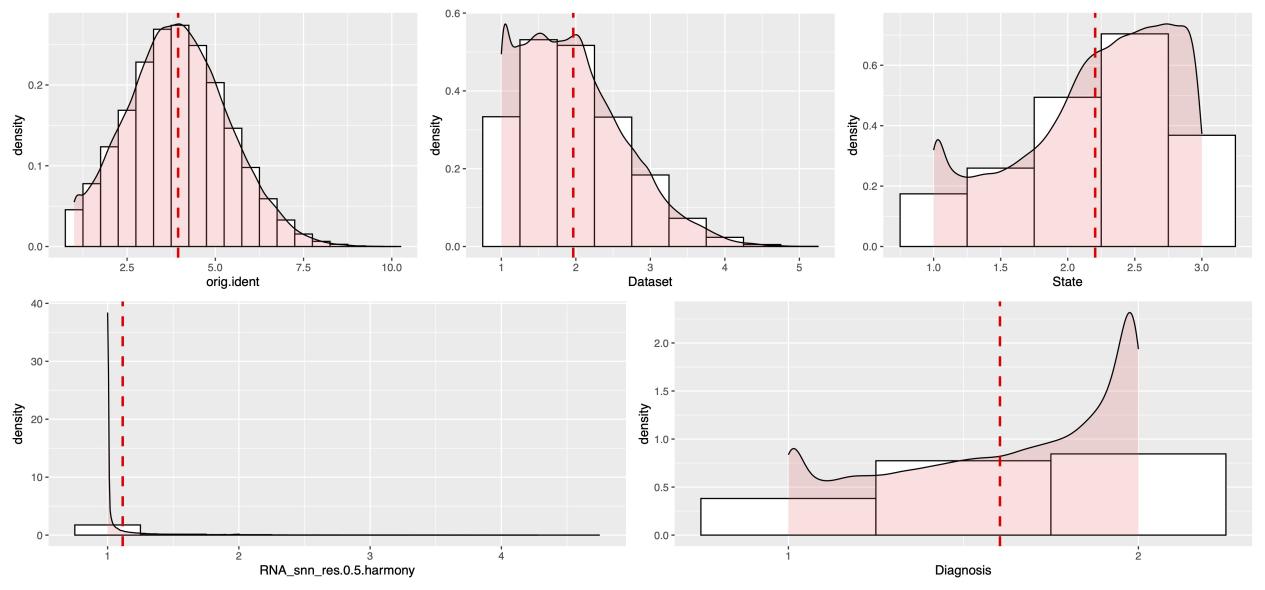


Figure S8 Comparison of lisi score of different situation with harmony batch correction


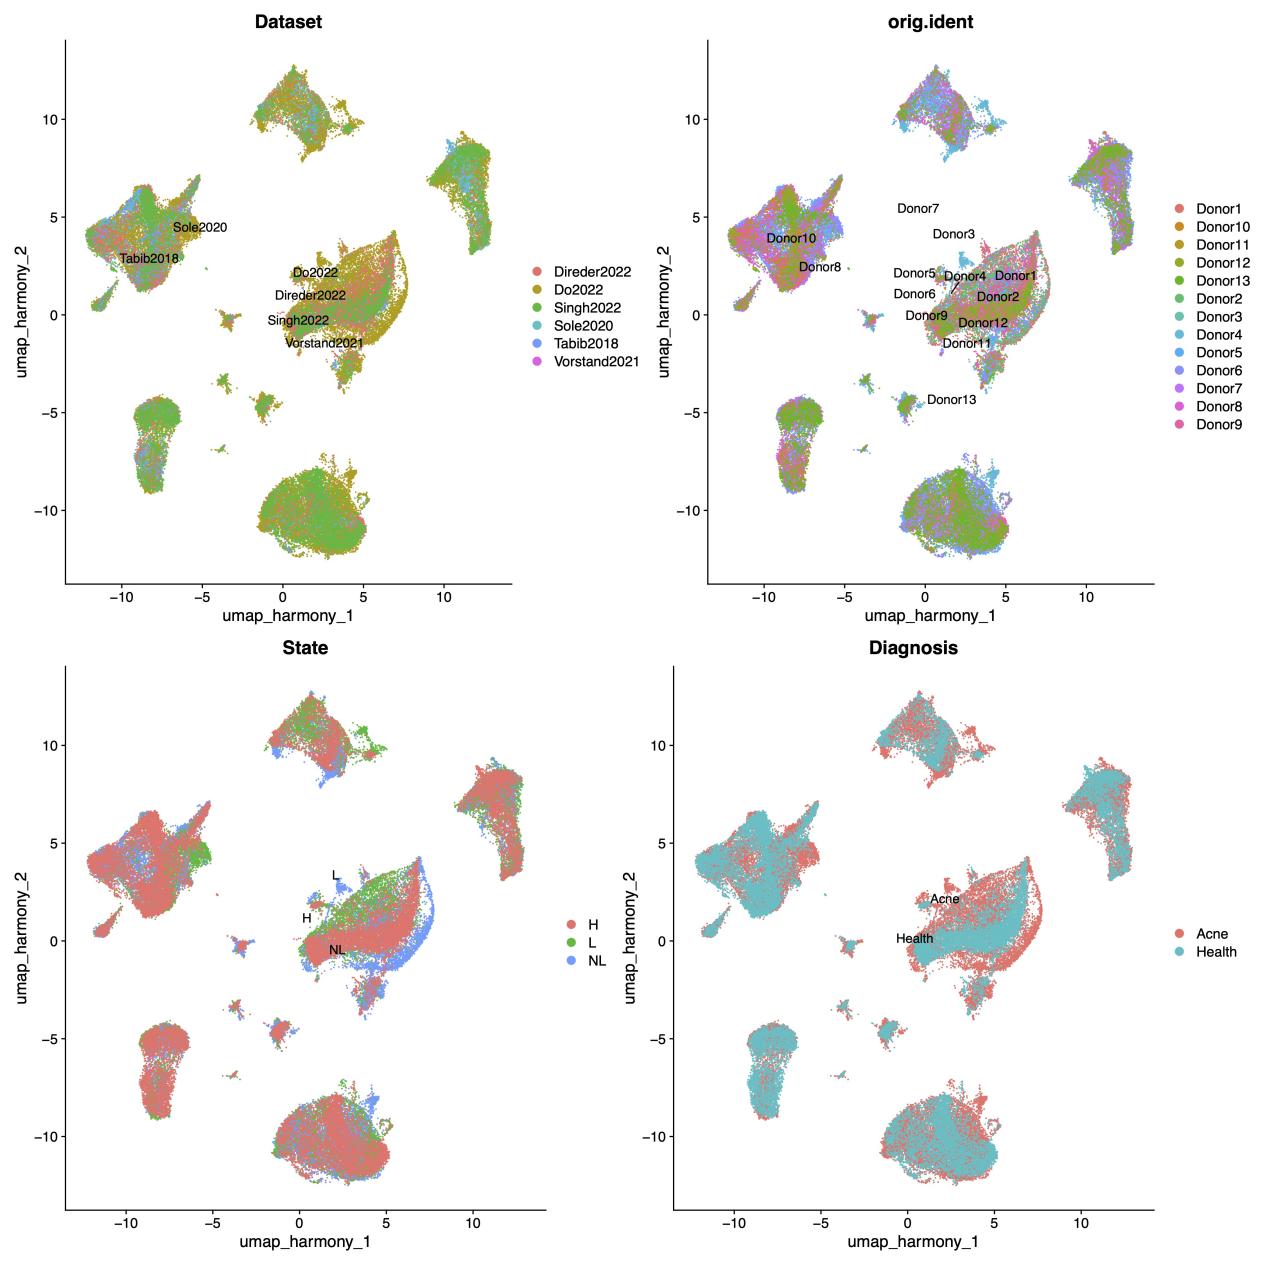


Figure S9 UMAP shows differences in batch effects


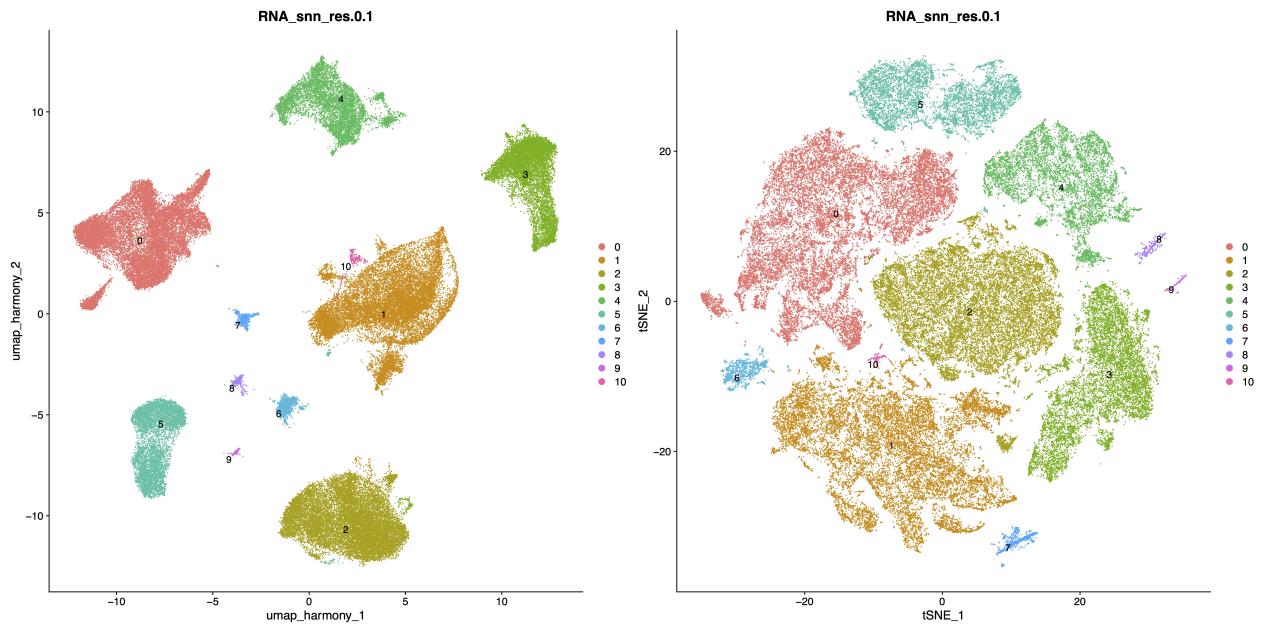


Figure S10 UMAP and tsne shows the cell clusters
